# Supplementary material for: Massive mobilization of toxic elements from an intact rock glacier in the Central Eastern Alps: insights into ice melt dynamics
Source: Copernicus journal article supplement (doi:10.5194/egusphere-2024-789), 2024-04-12
Supplement: Supplementary file 1 [file egusphere-2024-789-supplement.pdf]

# Massive mobilization of toxic elements from an intact rock glacier in the Central Eastern Alps: insights on ice melt dynamics

5

## Supplement

10 Hoda Moradi<sup>1</sup>, Gerhard Furrer<sup>2</sup>, Michael Margreth<sup>3</sup>, David Mair<sup>1</sup>, Christoph Wanner<sup>1</sup>

15 <sup>1</sup>Institute of Geological Sciences, Department of Earth Sciences, University of Bern, Baltzerstrasse 3, CH-3012 Bern, Switzerland

<sup>2</sup>Institute of Biochemistry and Pollutant Dynamics (IBP), Department of Environmental Systems Science, ETH Zurich, CH-8092 Zurich, Switzerland

20 <sup>3</sup>Swiss Federal Institute for Forest, Snow and Landscape Research WSL, Mountain Hydrology and Mass Movements, Zürichstrasse 111, CH-8903 Birmensdorf, Switzerland

*Correspondence to:* Hoda Moradi (hoda.moradi@unibe.ch)

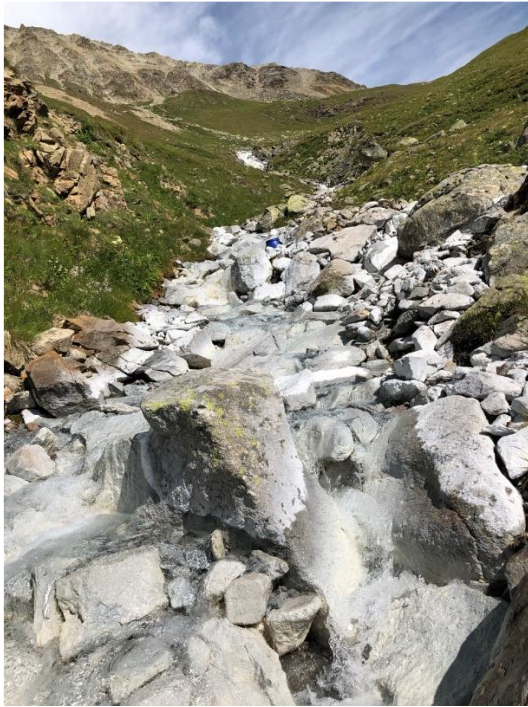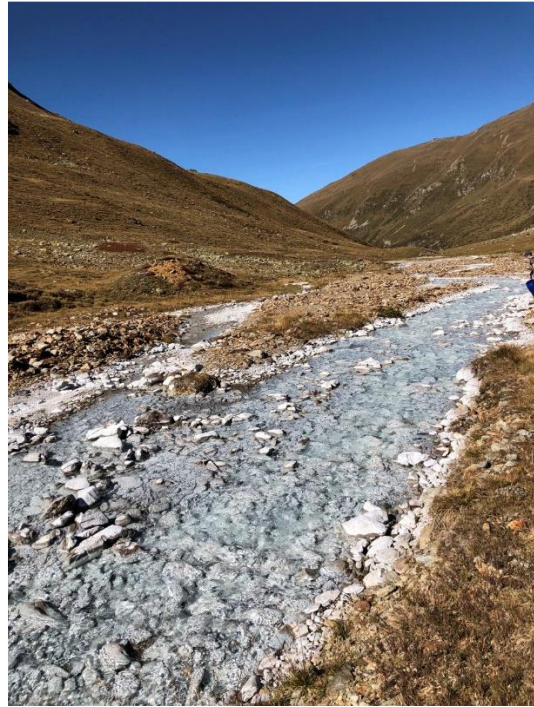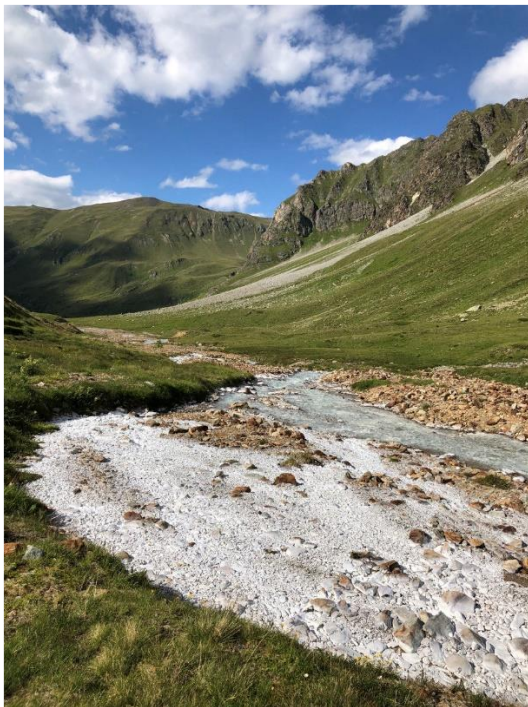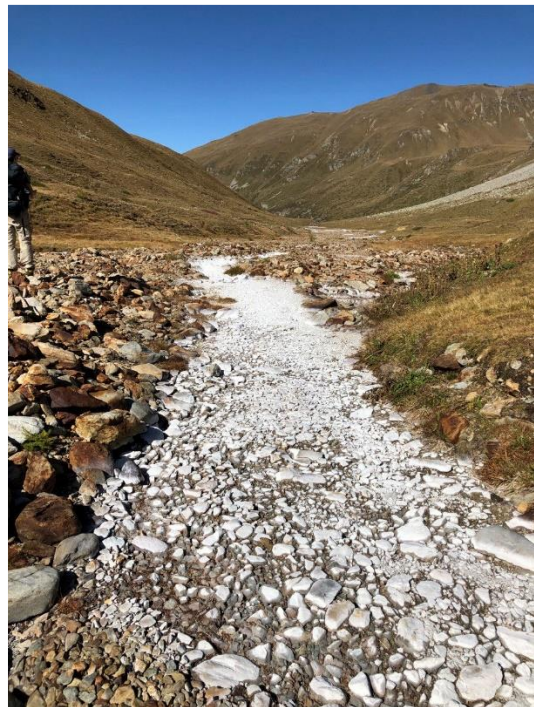

25 **Figure S1: Photographs of the Aua da Prasüra stream, Val Costainas, Switzerland, with white-colored streambed inherited from basaluminite precipitation.**

**Table S1: Chemical analysis of streamwater samples collected between March 2021 and November 2022 at the AP10 location of the Aua Prasūra stream (Fig. 1).**

| AP10                               | Method     | Unit                | 22 Mar 2021 | 09 Apr 2021 | 23 Apr 2021 | 07 May 2021 | 20 May 2021 | 03 Jun 2021 | 10 Jun 2021 | 08 Jul 2021 |
|------------------------------------|------------|---------------------|-------------|-------------|-------------|-------------|-------------|-------------|-------------|-------------|
| <b>T</b>                           | Electrode  | °C                  | n.a.        | n.a.        | n.a.        | n.a.        | n.a.        | n.a.        | 5.9         | 9.5         |
| <b>pH</b>                          | Electrode  | -                   | 7.08        | 6.59        | 6.51        | 6.44        | 6.44        | 6.45        | 7.14        | 6.43        |
| <b>EC</b>                          | Electrode  | μS cm <sup>-1</sup> | n.a.        | n.a.        | n.a.        | n.a.        | n.a.        | n.a.        | 133.5       | 434         |
| <b>Na<sup>+</sup></b>              | IC         | mg L <sup>-1</sup>  | 1.95        | 1.79        | 1.79        | 1.78        | 1.81        | 1.53        | 1.41        | 2.84        |
| <b>K<sup>+</sup></b>               | IC         | mg L <sup>-1</sup>  | 0.597       | 0.579       | 0.558       | 0.563       | 0.532       | 0.446       | 0.381       | 0.560       |
| <b>Ca<sup>2+</sup></b>             | IC         | mg L <sup>-1</sup>  | 31.4        | 27.1        | 27.3        | 27.0        | 26.8        | 21.2        | 19.2        | 50.7        |
| <b>Mg<sup>2+</sup></b>             | IC         | mg L <sup>-1</sup>  | 15.4        | 13.2        | 13.0        | 14.1        | 15.3        | 12.6        | 11.7        | 45.7        |
| <b>Al</b>                          | ICP-OES    | mg L <sup>-1</sup>  | 0.021       | 0.013       | 0.043       | 0.026       | 0.030       | 0.049       | 0.057       | 0.402       |
| <b>Co</b>                          | ICP-OES    | mg L <sup>-1</sup>  | n.a.        | 0.018       |
| <b>Cu</b>                          | ICP-OES    | mg L <sup>-1</sup>  | n.a.        | <0.05       |
| <b>Fe</b>                          | ICP-OES    | mg L <sup>-1</sup>  | n.a.        | <0.005      |
| <b>Mn</b>                          | ICP-OES    | mg L <sup>-1</sup>  | <0.005      | <0.005      | <0.005      | <0.005      | <0.005      | <0.005      | 0.008       | 0.365       |
| <b>Ni</b>                          | ICP-OES    | mg L <sup>-1</sup>  | 0.036       | 0.021       | 0.018       | 0.045       | 0.042       | 0.039       | 0.039       | 0.245       |
| <b>Sr</b>                          | ICP-OES    | mg L <sup>-1</sup>  | 0.150       | 0.115       | 0.123       | 0.107       | 0.099       | 0.073       | 0.062       | 0.143       |
| <b>Zn</b>                          | ICP-OES    | mg L <sup>-1</sup>  | 0.052       | 0.050       | 0.046       | 0.068       | 0.108       | 0.123       | 0.130       | 0.624       |
| <b>As</b>                          | AAS        | μg L <sup>-1</sup>  | n.a.        |
| <b>F<sup>-</sup></b>               | IC         | mg L <sup>-1</sup>  | 0.610       | 0.596       | 0.608       | 0.623       | 0.710       | 0.773       | 0.772       | 1.85        |
| <b>Cl<sup>-</sup></b>              | IC         | mg L <sup>-1</sup>  | 0.176       | 0.264       | 0.170       | 0.179       | 0.175       | 0.147       | 0.126       | 0.260       |
| <b>Br<sup>-</sup></b>              | IC         | mg L <sup>-1</sup>  | <0.016      | <0.016      | <0.016      | <0.016      | <0.016      | <0.016      | <0.016      | <0.016      |
| <b>NO<sub>3</sub><sup>-</sup></b>  | IC         | mg L <sup>-1</sup>  | 0.540       | 0.750       | 0.554       | 0.553       | 0.628       | 0.598       | 0.619       | 0.590       |
| <b>SO<sub>4</sub><sup>2-</sup></b> | IC         | mg L <sup>-1</sup>  | 114         | 95.5        | 94.6        | 101         | 107         | 86.3        | 79.6        | 308         |
| <b>Si</b>                          | ICP-OES    | mg L <sup>-1</sup>  | 3.18        | 3.01        | 3.05        | 3.08        | 2.97        | 2.70        | 2.57        | 2.88        |
| <b>TOC</b>                         | C-analyzer | mg L <sup>-1</sup>  | n.a.        | <1          |
| <b>TIC</b>                         | C-analyzer | mg L <sup>-1</sup>  | n.a.        | 0.96        |
| <b>TDS</b>                         |            | mg L <sup>-1</sup>  | 168.36      | 142.98      | 141.86      | 149.19      | 156.26      | 126.58      | 116.69      | 416.66      |

Table S1 continued

| AP10                               | Method     | Unit                | 18 Aug 2021 | 18 Jun 2021 | 02 Jul 2021 | 16 Jul 2021 | 06 Aug 2021 | 22 Sep 2021 | 03 Sep 2021 | 30 Sep 2021 |
|------------------------------------|------------|---------------------|-------------|-------------|-------------|-------------|-------------|-------------|-------------|-------------|
| <b>T</b>                           | Electrode  | °C                  | 8.7         | n.a         | n.a         | n.a         | n.a         | 4.7         | n.a         | n.a         |
| <b>pH</b>                          | Electrode  | -                   | 7.47        | 6.17        | 6.08        | 6.00        | 6.02        | 7.66        | 6.53        | 6.25        |
| <b>EC</b>                          | Electrode  | μS cm <sup>-1</sup> | 291         | n.a         | n.a         | n.a         | n.a         | 326         | n.a         | n.a         |
| <b>Na<sup>+</sup></b>              | IC         | mg L <sup>-1</sup>  | 2.31        | 1.67        | 2.60        | 2.69        | 2.42        | 2.42        | 2.30        | 2.58        |
| <b>K<sup>+</sup></b>               | IC         | mg L <sup>-1</sup>  | <1          | <1          | <1          | <1          | <1          | 0.629       | <1          | <1          |
| <b>Ca<sup>2+</sup></b>             | IC         | mg L <sup>-1</sup>  | 35.9        | 23.1        | 42.1        | 45.5        | 40.0        | 42.6        | 39.6        | 47.9        |
| <b>Mg<sup>2+</sup></b>             | IC         | mg L <sup>-1</sup>  | 28.2        | 16.3        | 36.2        | 39.0        | 33.0        | 31.5        | 29.3        | 36.1        |
| <b>Al</b>                          | ICP-OES    | mg L <sup>-1</sup>  | 0.081       | 0.098       | 0.186       | 0.278       | 0.116       | 0.064       | 0.146       | <0.05       |
| <b>Co</b>                          | ICP-OES    | mg L <sup>-1</sup>  | <0.05       | <0.05       | <0.05       | <0.05       | <0.05       | <0.005      | <0.005      | <0.005      |
| <b>Cu</b>                          | ICP-OES    | mg L <sup>-1</sup>  | <0.5        | <0.5        | <0.5        | <0.5        | <0.5        | <0.01       | <0.01       | <0.005      |
| <b>Fe</b>                          | ICP-OES    | mg L <sup>-1</sup>  | <0.05       | <0.05       | <0.05       | <0.05       | <0.05       | <0.005      | <0.005      | <0.005      |
| <b>Mn</b>                          | ICP-OES    | mg L <sup>-1</sup>  | 0.160       | 0.084       | 0.286       | 0.315       | 0.247       | 0.079       | 0.103       | 0.10        |
| <b>Ni</b>                          | ICP-OES    | mg L <sup>-1</sup>  | 0.138       | 0.077       | 0.190       | 0.206       | 0.171       | 0.134       | 0.136       | 0.154       |
| <b>Sr</b>                          | ICP-OES    | mg L <sup>-1</sup>  | 0.126       | 0.079       | 0.138       | 0.150       | 0.132       | 0.159       | 0.139       | 0.163       |
| <b>Zn</b>                          | ICP-OES    | mg L <sup>-1</sup>  | 0.388       | 0.251       | 0.526       | 0.560       | 0.459       | 0.333       | 0.349       | 0.408       |
| <b>As</b>                          | AAS        | μg L <sup>-1</sup>  | n.a         |
| <b>F<sup>-</sup></b>               | IC         | mg L <sup>-1</sup>  | 1.260       | 0.960       | 1.500       | 1.560       | 1.420       | 1.17        | 1.21        | 1.15        |
| <b>Cl<sup>-</sup></b>              | IC         | mg L <sup>-1</sup>  | 0.250       | 0.220       | 0.280       | 0.260       | 0.300       | 0.239       | 0.203       | 0.300       |
| <b>Br<sup>-</sup></b>              | IC         | mg L <sup>-1</sup>  | <0.16       | <0.16       | <0.16       | <0.16       | <0.16       | <0.016      | <0.016      | <0.16       |
| <b>NO<sub>3</sub><sup>-</sup></b>  | IC         | mg L <sup>-1</sup>  | 0.660       | 0.910       | 0.640       | 0.630       | 0.600       | 0.563       | 0.574       | 0.690       |
| <b>SO<sub>4</sub><sup>2-</sup></b> | IC         | mg L <sup>-1</sup>  | 195         | 121         | 244         | 262         | 227         | 229         | 211         | 253         |
| <b>Si</b>                          | ICP-OES    | mg L <sup>-1</sup>  | 3.53        | 2.67        | 3.55        | 3.60        | 3.47        | 3.30        | 3.23        | 3.80        |
| <b>TOC</b>                         | C-analyzer | mg L <sup>-1</sup>  | <0.5        | <0.5        | 0.50        | <0.5        | <0.5        | 0.45        | n.a         | n.a         |
| <b>TIC</b>                         | C-analyzer | mg L <sup>-1</sup>  | 2.54        | 1.88        | 1.41        | 1.54        | 2.05        | 3.05        | n.a         | n.a         |
| <b>TDS</b>                         |            | mg L <sup>-1</sup>  | 271.01      | 169.40      | 334.27      | 357.81      | 311.40      | 315.37      | 288.37      | 346.40      |

**Table S1 continued**

| <b>AP10</b>                        | <b>Method</b> | <b>Unit</b>         | <b>11 Oct 2021</b> | <b>21 Oct 2021</b> | <b>29 Oct 2021</b> | <b>02 Apr 2022</b> | <b>20 Apr 2021</b> | <b>29 Apr 2022</b> | <b>14 May 2022</b> | <b>19 May 2022</b> |
|------------------------------------|---------------|---------------------|--------------------|--------------------|--------------------|--------------------|--------------------|--------------------|--------------------|--------------------|
| <b>T</b>                           | Electrode     | °C                  | n.a.               | 4                  | n.a.               | 0.6                | n.a.               | n.a.               | n.a.               | 9.5                |
| <b>pH</b>                          | Electrode     | -                   | 6.38               | 6.67               | 7.07               | 6.81               | 6.85               | 6.19               | 6.41               | 7.73               |
| <b>EC</b>                          | Electrode     | μS cm <sup>-1</sup> | n.a.               | 338                | n.a.               | 183                | n.a.               | n.a.               | n.a.               | 209                |
| <b>Na<sup>+</sup></b>              | IC            | mg L <sup>-1</sup>  | 2.73               | 2.67               | 2.54               | 1.968              | 1.90               | 1.94               | 1.80               | 1.54               |
| <b>K<sup>+</sup></b>               | IC            | mg L <sup>-1</sup>  | 0.644              | 0.633              | <1                 | 0.987              | 0.641              | 0.653              | 0.545              | 0.441              |
| <b>Ca<sup>2+</sup></b>             | IC            | mg L <sup>-1</sup>  | 52.2               | 51.4               | 51.1               | 36.260             | 33.3               | 33.7               | 33.4               | 27.0               |
| <b>Mg<sup>2+</sup></b>             | IC            | mg L <sup>-1</sup>  | 40.2               | 38.3               | 37.0               | 17.589             | 16.3               | 17.2               | 21.8               | 18.0               |
| <b>Al</b>                          | ICP-OES       | mg L <sup>-1</sup>  | <0.05              | <0.05              | <0.1               | <0.05              | <0.05              | <0.05              | <0.05              | 0.08               |
| <b>Co</b>                          | ICP-OES       | mg L <sup>-1</sup>  | <0.005             | <0.005             | <0.1               | <0.05              | <0.05              | <0.05              | <0.05              | <0.05              |
| <b>Cu</b>                          | ICP-OES       | mg L <sup>-1</sup>  | <0.005             | <0.005             | <0.02              | <0.5               | <0.5               | <0.5               | <0.5               | <0.5               |
| <b>Fe</b>                          | ICP-OES       | mg L <sup>-1</sup>  | <0.005             | <0.005             | <0.02              | <0.05              | <0.05              | <0.05              | <0.05              | <0.05              |
| <b>Mn</b>                          | ICP-OES       | mg L <sup>-1</sup>  | 0.109              | 0.060              | 0.037              | <0.05              | <0.005             | <0.005             | 0.007              | 0.014              |
| <b>Ni</b>                          | ICP-OES       | mg L <sup>-1</sup>  | 0.173              | 0.156              | 0.138              | 0.021              | 0.019              | 0.023              | 0.068              | 0.063              |
| <b>Sr</b>                          | ICP-OES       | mg L <sup>-1</sup>  | 0.170              | 0.172              | 0.167              | 0.159              | 0.135              | 0.137              | 0.111              | 0.087              |
| <b>Zn</b>                          | ICP-OES       | mg L <sup>-1</sup>  | 0.434              | 0.422              | 0.347              | 0.057              | 0.050              | 0.058              | 0.212              | 0.201              |
| <b>As</b>                          | AAS           | μg L <sup>-1</sup>  | n.a.               |
| <b>F<sup>-</sup></b>               | IC            | mg L <sup>-1</sup>  | 1.10               | 1.04               | 0.964              | 0.531              | 0.555              | 0.576              | 0.818              | 0.834              |
| <b>Cl<sup>-</sup></b>              | IC            | mg L <sup>-1</sup>  | 0.340              | 2.670              | 0.229              | 0.197              | 0.255              | 0.240              | 0.199              | 0.176              |
| <b>Br<sup>-</sup></b>              | IC            | mg L <sup>-1</sup>  | <0.16              | <0.16              | <0.016             | <0.016             | <0.016             | <0.016             | <0.016             | <0.016             |
| <b>NO<sub>3</sub><sup>-</sup></b>  | IC            | mg L <sup>-1</sup>  | 1.16               | 0.890              | 0.702              | 0.581              | 0.686              | 0.624              | 0.962              | 0.630              |
| <b>SO<sub>4</sub><sup>2-</sup></b> | IC            | mg L <sup>-1</sup>  | 273                | 268                | 265                | 144                | 123                | 137                | 157                | 130                |
| <b>Si</b>                          | ICP-OES       | mg L <sup>-1</sup>  | 3.92               | 3.87               | 3.326              | 2.922              | n.a.               | n.a.               | n.a.               | n.a.               |
| <b>TOC</b>                         | C-analyzer    | mg L <sup>-1</sup>  | n.a.               | 0.54               | n.a.               | n.a.               | n.a.               | n.a.               | n.a.               | 1.23               |
| <b>TIC</b>                         | C-analyzer    | mg L <sup>-1</sup>  | n.a.               | 1.76               | n.a.               | n.a.               | n.a.               | n.a.               | n.a.               | 2.12               |
| <b>TDS</b>                         |               | mg L <sup>-1</sup>  | 376.54             | 372.63             | 361.63             | 205.40             | 176.51             | 192.01             | 216.41             | 181.95             |

**Table S1 continued**

| <b>AP10</b>                        | <b>Method</b> | <b>Unit</b>         | <b>19 May 2022</b> | <b>20 May 2022</b> | <b>03 Jun 2022</b> | <b>16 Jun 2022</b> | <b>05 Jul 2022</b> | <b>07 Jul 2022</b> | <b>13 Jul 2022</b> | <b>29 Jul 2022</b> |
|------------------------------------|---------------|---------------------|--------------------|--------------------|--------------------|--------------------|--------------------|--------------------|--------------------|--------------------|
| <b>T</b>                           | Electrode     | °C                  | 6.1                | 5.1                | n.a.               | n.a.               | 11.4               | 9                  | n.a.               | n.a.               |
| <b>pH</b>                          | Electrode     | -                   | 8.10               | 7.90               | 6.44               | 6.18               | 6.91               | 6.91               | 6.49               | 6.34               |
| <b>EC</b>                          | Electrode     | µS cm <sup>-1</sup> | 182                | 181                | n.a.               | n.a.               | 440                | 421                | n.a.               | n.a.               |
| <b>Na<sup>+</sup></b>              | IC            | mg L <sup>-1</sup>  | 1.52               | 1.63               | 2.29               | 2.58               | 2.88               | 2.91               | 2.70               | 2.74               |
| <b>K<sup>+</sup></b>               | IC            | mg L <sup>-1</sup>  | 0.424              | 0.432              | <1                 | <1                 | <1                 | <1                 | 0.676              | 0.665              |
| <b>Ca<sup>2+</sup></b>             | IC            | mg L <sup>-1</sup>  | 25.4               | 26.2               | 41.3               | 48.4               | 53.3               | 54.9               | 49.9               | 49.8               |
| <b>Mg<sup>2+</sup></b>             | IC            | mg L <sup>-1</sup>  | 17.0               | 17.2               | 32.9               | 39.7               | 43.5               | 44.9               | 39.6               | 39.4               |
| <b>Al</b>                          | ICP-OES       | mg L <sup>-1</sup>  | 0.07               | 0.057              | 0.112              | 0.121              | 0.131              | 0.154              | 0.076              | 0.07               |
| <b>Co</b>                          | ICP-OES       | mg L <sup>-1</sup>  | <0.05              | <0.05              | <0.005             | <0.005             | <0.005             | <0.005             | <0.005             | <0.005             |
| <b>Cu</b>                          | ICP-OES       | mg L <sup>-1</sup>  | <0.5               | <0.5               | <0.005             | 0.0058             | <0.005             | 0.0052             | <0.005             | <0.005             |
| <b>Fe</b>                          | ICP-OES       | mg L <sup>-1</sup>  | <0.05              | <0.05              | 0.0228             | 0.0260             | 0.0282             | 0.0275             | 0.0263             | 0.0329             |
| <b>Mn</b>                          | ICP-OES       | mg L <sup>-1</sup>  | 0.020              | 0.013              | 0.142              | 0.176              | 0.199              | 0.208              | 0.152              | 0.128              |
| <b>Ni</b>                          | ICP-OES       | mg L <sup>-1</sup>  | 0.062              | 0.058              | 0.138              | 0.174              | 0.197              | 0.200              | 0.179              | 0.173              |
| <b>Sr</b>                          | ICP-OES       | mg L <sup>-1</sup>  | 0.080              | 0.083              | 0.120              | 0.143              | 0.159              | 0.161              | 0.162              | 0.169              |
| <b>Zn</b>                          | ICP-OES       | mg L <sup>-1</sup>  | 0.203              | 0.192              | 0.400              | 0.487              | 0.529              | 0.547              | 0.477              | 0.460              |
| <b>As</b>                          | AAS           | µg L <sup>-1</sup>  | n.a.               |
| <b>F<sup>-</sup></b>               | IC            | mg L <sup>-1</sup>  | 0.811              | 0.815              | 1.34               | 1.51               | 1.59               | 1.61               | 1.47               | 1.40               |
| <b>Cl<sup>-</sup></b>              | IC            | mg L <sup>-1</sup>  | 0.163              | 0.164              | 0.330              | 1.17               | 0.530              | 0.350              | 0.270              | 0.281              |
| <b>Br<sup>-</sup></b>              | IC            | mg L <sup>-1</sup>  | <0.016             | <0.016             | <0.16              | <0.16              | <0.16              | <0.16              | <0.016             | <0.016             |
| <b>NO<sub>3</sub><sup>-</sup></b>  | IC            | mg L <sup>-1</sup>  | 0.594              | 0.664              | 0.840              | 1.24               | 0.720              | 0.590              | 0.678              | 0.640              |
| <b>SO<sub>4</sub><sup>2-</sup></b> | IC            | mg L <sup>-1</sup>  | 117                | 121                | 218                | 254                | 285                | 293                | 273                | 276                |
| <b>Si</b>                          | ICP-OES       | mg L <sup>-1</sup>  | n.a.               | n.a.               | 2.879              | 2.99               | 3.30               | 3.21               | 3.15               | 3.23               |
| <b>TOC</b>                         | C-analyzer    | mg L <sup>-1</sup>  | 1.10               | 0.91               | n.a.               | n.a.               | <0.5               | <0.5               | n.a.               | n.a.               |
| <b>TIC</b>                         | C-analyzer    | mg L <sup>-1</sup>  | 1.89               | 2.38               | n.a.               | n.a.               | 1.59               | 1.66               | n.a.               | n.a.               |
| <b>TDS</b>                         |               | mg L <sup>-1</sup>  | 166.26             | 171.33             | 300.45             | 353.18             | 393.16             | 404.11             | 372.32             | 375.56             |

45 **Table S1 continued**

| <b>AP10</b>                        | <b>Method</b> | <b>Unit</b>         | <b>12 Aug 2022</b> | <b>26 Aug 2022</b> | <b>13 Sep 2022</b> | <b>30 Sep 2022</b> | <b>10 Oct 2022</b> | <b>28 Oct 2022</b> | <b>15 Nov 2022</b> |
|------------------------------------|---------------|---------------------|--------------------|--------------------|--------------------|--------------------|--------------------|--------------------|--------------------|
| <b>T</b>                           | Electrode     | °C                  | 10                 | n.a.               | n.a.               | n.a.               | 6.8                | n.a.               | n.a.               |
| <b>pH</b>                          | Electrode     | -                   | 7.10               | 6.70               | 6.12               | 6.30               | 7.27               | 6.43               | 6.29               |
| <b>EC</b>                          | Electrode     | µS cm <sup>-1</sup> | 424                | n.a.               | n.a.               | n.a.               | 371                | n.a.               | n.a.               |
| <b>Na<sup>+</sup></b>              | IC            | mg L <sup>-1</sup>  | 2.83               | 2.25               | 2.23               | 2.02               | 2.72               | 2.327              | 2.182              |
| <b>K<sup>+</sup></b>               | IC            | mg L <sup>-1</sup>  | 0.689              | 0.714              | 0.630              | 0.659              | 0.702              | 0.595              | 0.616              |
| <b>Ca<sup>2+</sup></b>             | IC            | mg L <sup>-1</sup>  | 53.8               | 54.5               | 61.6               | 51.9               | 53.1               | 41.6               | 37.9               |
| <b>Mg<sup>2+</sup></b>             | IC            | mg L <sup>-1</sup>  | 42.8               | 42.8               | 47.9               | 39.6               | 39.9               | 30.3               | 24.9               |
| <b>Al</b>                          | ICP-OES       | mg L <sup>-1</sup>  | 0.08               | 0.10               | 0.18               | 0.094              | 0.067              | 0.10               | <0.05              |
| <b>Co</b>                          | ICP-OES       | mg L <sup>-1</sup>  | <0.005             | <0.005             | <0.005             | <0.005             | <0.005             | <0.005             | <0.005             |
| <b>Cu</b>                          | ICP-OES       | mg L <sup>-1</sup>  | <0.005             | <0.01              | <0.01              | <0.01              | <0.01              | <0.005             | <0.005             |
| <b>Fe</b>                          | ICP-OES       | mg L <sup>-1</sup>  | 0.0278             | <0.05              | <0.05              | <0.05              | <0.05              | 0.03               | 0.03               |
| <b>Mn</b>                          | ICP-OES       | mg L <sup>-1</sup>  | 0.155              | 0.157              | 0.193              | 0.122              | 0.109              | 0.101              | 0.023              |
| <b>Ni</b>                          | ICP-OES       | mg L <sup>-1</sup>  | 0.189              | 0.19               | 0.21               | 0.17               | 0.16               | 0.12               | 0.08               |
| <b>Sr</b>                          | ICP-OES       | mg L <sup>-1</sup>  | 0.173              | 0.19               | 0.20               | 0.18               | 0.18               | 0.13               | 0.13               |
| <b>Zn</b>                          | ICP-OES       | mg L <sup>-1</sup>  | 0.516              | 0.525              | 0.601              | 0.489              | 0.446              | 0.364              | 0.252              |
| <b>As</b>                          | AAS           | µg L <sup>-1</sup>  | n.a.               |
| <b>F<sup>-</sup></b>               | IC            | mg L <sup>-1</sup>  | 1.47               | 1.51               | 1.62               | 1.38               | 1.37               | 1.270              | 1.050              |
| <b>Cl<sup>-</sup></b>              | IC            | mg L <sup>-1</sup>  | 0.273              | 0.287              | 0.340              | 0.302              | 0.305              | 0.326              | 0.252              |
| <b>Br<sup>-</sup></b>              | IC            | mg L <sup>-1</sup>  | <0.016             | <0.016             | <0.016             | <0.016             | <0.016             | <0.016             | <0.016             |
| <b>NO<sub>3</sub><sup>-</sup></b>  | IC            | mg L <sup>-1</sup>  | 0.687              | 0.677              | 0.832              | 0.756              | 0.758              | 0.853              | 0.831              |
| <b>SO<sub>4</sub><sup>2-</sup></b> | IC            | mg L <sup>-1</sup>  | 292                | 290                | 327                | 274                | 270                | 211.170            | 178.450            |
| <b>Si</b>                          | ICP-OES       | mg L <sup>-1</sup>  | 3.39               | 3.33               | 3.42               | 3.55               | 3.23               | 3.67               | 3.65               |
| <b>TOC</b>                         | C-analyzer    | mg L <sup>-1</sup>  | <0.5               | n.a.               | n.a.               | n.a.               | <0.5               | n.a.               | n.a.               |
| <b>TIC</b>                         | C-analyzer    | mg L <sup>-1</sup>  | 1.92               | n.a.               | n.a.               | n.a.               | 2.32               | n.a.               | n.a.               |
| <b>TDS</b>                         |               | mg L <sup>-1</sup>  | 400.80             | 397.44             | 447.31             | 375.29             | 375.63             | 292.99             | 250.37             |

**Table S2: Chemical analysis of streamwater samples collected between June 2021 and October 2022 at the AP5 location of the Aua Prasiira stream (Fig. 1).**

| AP5                                | Method     | Unit                | 11 Jun 2021 | 09 Jul 2021 | 20 Aug 2021 | 23 Sep 2021 | 20 Oct 2021 | 06 Jul 2022 | 13 Aug 2022 | 11 Oct 2022 |
|------------------------------------|------------|---------------------|-------------|-------------|-------------|-------------|-------------|-------------|-------------|-------------|
| <b>T</b>                           | Electrode  | °C                  | 1.4         | 4.9         | 5.7         | 4.9         | 2.5         | 8.9         | 6           | 5.4         |
| <b>pH</b>                          | Electrode  | -                   | 5.71        | 5.60        | 5.54        | 5.32        | 5.56        | 5.57        | 5.63        | 5.68        |
| <b>EC</b>                          | Electrode  | µS cm <sup>-1</sup> | 317         | 749         | 995         | 1208        | 1077        | 991         | 1039        | 1114        |
| <b>Na<sup>+</sup></b>              | IC         | mg L <sup>-1</sup>  | 2.55        | 4.97        | 6.14        | 7.64        | 8.07        | 4.56        | 6.72        | 6.97        |
| <b>K<sup>+</sup></b>               | IC         | mg L <sup>-1</sup>  | 0.434       | 0.850       | 1.03        | 1.07        | 1.05        | 1.12        | 1.07        | 1.06        |
| <b>Ca<sup>2+</sup></b>             | IC         | mg L <sup>-1</sup>  | 49.6        | 94.8        | 123         | 168         | 162         | 126         | 138.9       | 157         |
| <b>Mg<sup>2+</sup></b>             | IC         | mg L <sup>-1</sup>  | 42.4        | 109         | 154         | 206         | 194         | 139         | 161.1       | 179         |
| <b>Al</b>                          | ICP-OES    | mg L <sup>-1</sup>  | 1.42        | 5.35        | 7.761       | 8.30        | 7.32        | 6.62        | 7.84        | 7.60        |
| <b>Co</b>                          | ICP-OES    | mg L <sup>-1</sup>  | 0.013       | 0.058       | <0.05       | 0.029       | <0.05       | 0.031       | 0.028       | 0.024       |
| <b>Cu</b>                          | ICP-OES    | mg L <sup>-1</sup>  | <0.5        | <0.5        | <0.5        | 0.067       | 0.072       | 0.0625      | 0.0682      | 0.06        |
| <b>Fe</b>                          | ICP-OES    | mg L <sup>-1</sup>  | 0.006       | <0.05       | <0.05       | 0.012       | <0.05       | <0.005      | <0.005      | <0.05       |
| <b>Mn</b>                          | ICP-OES    | mg L <sup>-1</sup>  | 0.079       | 1.415       | 1.73        | 1.60        | 1.47        | 1.381       | 1.56        | 1.41        |
| <b>Ni</b>                          | ICP-OES    | mg L <sup>-1</sup>  | 0.185       | 0.733       | 1.001       | 1.225       | 1.155       | 0.847       | 1.01        | 1.06        |
| <b>Sr</b>                          | ICP-OES    | mg L <sup>-1</sup>  | n.a.        | n.a.        | 0.355       | 0.460       | 0.434       | 0.326       | 0.387       | 0.43        |
| <b>Zn</b>                          | ICP-OES    | mg L <sup>-1</sup>  | 0.560       | 1.764       | 2.61        | 3.007       | 2.871       | 2.22        | 2.69        | 2.851       |
| <b>As</b>                          | AAS        | µg L <sup>-1</sup>  | n.a.        | n.a.        | n.a.        | n.a.        | <4          | <4          | <4          | <4          |
| <b>F<sup>-</sup></b>               | IC         | mg L <sup>-1</sup>  | 1.877       | 5.65        | 3.200       | 2.89        | 2.46        | 6.47        | 0.468       | 1.55        |
| <b>Cl<sup>-</sup></b>              | IC         | mg L <sup>-1</sup>  | 0.250       | 0.500       | 0.680       | 0.944       | 2.71        | 0.780       | 0.829       | 0.831       |
| <b>Br<sup>-</sup></b>              | IC         | mg L <sup>-1</sup>  | <0.016      | <0.016      | <0.16       | <0.016      | <0.16       | <0.16       | <0.016      | <0.016      |
| <b>NO<sub>3</sub><sup>-</sup></b>  | IC         | mg L <sup>-1</sup>  | 0.656       | 0.860       | 0.930       | 0.840       | 1.21        | 0.920       | 0.925       | 1.042       |
| <b>SO<sub>4</sub><sup>2-</sup></b> | IC         | mg L <sup>-1</sup>  | 285         | 679         | 965         | 1287        | 1212        | 822         | 1033        | 1141        |
| <b>Si</b>                          | ICP-OES    | mg L <sup>-1</sup>  | 2.74        | 3.68        | 6.47        | 5.20        | 7.03        | 4.81        | 5.54        | 5.58        |
| <b>TOC</b>                         | C-analyzer | mg L <sup>-1</sup>  | 0.51        | <1          | 0.63        | 0.57        | 0.63        | <0.5        | 0.55        | 0.87        |
| <b>TIC</b>                         | C-analyzer | mg L <sup>-1</sup>  | <0.5        | <0.5        | <0.5        | 0.50        | 0.59        | <0.5        | 0.53        | 0.52        |
| <b>TDS</b>                         |            | mg L <sup>-1</sup>  | 387.98      | 909.05      | 1274.47     | 1695.86     | 1604.66     | 1117.13     | 1363.17     | 1509.12     |



**Table S3: Chemical analysis of streamwater samples collected between July 2021 and October 2022 at the AP3 location of the Aua Prasiira stream (Fig. 1).**

| <b>AP3</b>                         | <b>Method</b> | <b>Unit</b>         | <b>09 Jul 2021</b> | <b>20 Aug 2021</b> | <b>23 Sep 2021</b> | <b>06 Jul 2022</b> | <b>13 Aug 2022</b> | <b>11 Oct 2022</b> |
|------------------------------------|---------------|---------------------|--------------------|--------------------|--------------------|--------------------|--------------------|--------------------|
| <b>T</b>                           | Electrode     | °C                  | 2.9                | 3.5                | 4.1                | 4.7                | 5                  | 3.5                |
| <b>pH</b>                          | Electrode     | -                   | 6.37               | 6.04               | 5.77               | 6.35               | 6.21               | 5.98               |
| <b>EC</b>                          | Electrode     | µS cm <sup>-1</sup> | 403                | 686                | 854                | 642                | 832                | 797                |
| <b>Na<sup>+</sup></b>              | IC            | mg L <sup>-1</sup>  | 3.16               | 4.87               | 8.91               | 3.50               | 5.89               | 5.38               |
| <b>K<sup>+</sup></b>               | IC            | mg L <sup>-1</sup>  | 0.620              | <1                 | <1                 | <1                 | 0.975              | 0.878              |
| <b>Ca<sup>2+</sup></b>             | IC            | mg L <sup>-1</sup>  | 88.0               | 152                | 190                | 138                | 171.9              | 165                |
| <b>Mg<sup>2+</sup></b>             | IC            | mg L <sup>-1</sup>  | 40.1               | 67.9               | 94.3               | 66.9               | 86.0               | 80.7               |
| <b>Al</b>                          | ICP-OES       | mg L <sup>-1</sup>  | 0.466              | 1.254              | 1.47               | 0.55               | 0.69               | 0.96               |
| <b>Co</b>                          | ICP-OES       | mg L <sup>-1</sup>  | <0.005             | <0.05              | <0.005             | <0.005             | <0.005             | <0.005             |
| <b>Cu</b>                          | ICP-OES       | mg L <sup>-1</sup>  | <0.05              | <0.5               | <0.01              | <0.005             | <0.005             | <0.01              |
| <b>Fe</b>                          | ICP-OES       | mg L <sup>-1</sup>  | <0.005             | <0.05              | <0.005             | 0.0374             | 0.0426             | <0.05              |
| <b>Mn</b>                          | ICP-OES       | mg L <sup>-1</sup>  | 0.063              | <0.05              | 0.009              | 0.014              | 0.015              | 0.017              |
| <b>Ni</b>                          | ICP-OES       | mg L <sup>-1</sup>  | 0.096              | 0.078              | 0.118              | 0.051              | 0.064              | 0.08               |
| <b>Sr</b>                          | ICP-OES       | mg L <sup>-1</sup>  | n.a.               | 0.329              | 0.327              | 0.229              | 0.289              | 0.32               |
| <b>Zn</b>                          | ICP-OES       | mg L <sup>-1</sup>  | 0.180              | 0.149              | 0.202              | 0.122              | 0.131              | 0.182              |
| <b>As</b>                          | AAS           | µg L <sup>-1</sup>  | n.a.               | <4                 | 0.748              | <4                 | <4                 | <4                 |
| <b>F<sup>-</sup></b>               | IC            | mg L <sup>-1</sup>  | 1.38               | 4.280              | 2.26               | 1.59               | 1.71               | 1.52               |
| <b>Cl<sup>-</sup></b>              | IC            | mg L <sup>-1</sup>  | 0.550              | 0.320              | 0.514              | 0.460              | 0.749              | 0.350              |
| <b>Br<sup>-</sup></b>              | IC            | mg L <sup>-1</sup>  | <0.016             | <0.16              | <0.016             | <0.16              | <0.016             | <0.016             |
| <b>NO<sub>3</sub><sup>-</sup></b>  | IC            | mg L <sup>-1</sup>  | 0.730              | 0.870              | 0.689              | 1.25               | 1.075              | 0.960              |
| <b>SO<sub>4</sub><sup>2-</sup></b> | IC            | mg L <sup>-1</sup>  | 369                | 666                | 870                | 546                | 735                | 685                |
| <b>Si</b>                          | ICP-OES       | mg L <sup>-1</sup>  | 3.00               | 7.11               | 4.16               | 3.66               | 4.17               | 4.32               |
| <b>TOC</b>                         | C-analyzer    | mg L <sup>-1</sup>  | <1                 | <0.5               | 0.00               | <0.5               | <0.5               | <0.5               |
| <b>TIC</b>                         | C-analyzer    | mg L <sup>-1</sup>  | 1.82               | 2.97               | 4.31               | 4.12               | 4.79               | 6.39               |
| <b>TDS</b>                         |               | mg L <sup>-1</sup>  | 509.35             | 908.06             | 1177.59            | 766.47             | 1013.72            | 952.44             |

**Table S4: Chemical analysis of streamwater samples collected between July 2021 and October 2022 at the AP2 location of the Aua Prasiira stream (Fig. 1).**

| AP2                                | Method     | Unit                | 09 Jul 2021 | 20 Aug 2021 | 06 Jul 2022 | 13 Aug 2022 | 11 Oct 2022 |
|------------------------------------|------------|---------------------|-------------|-------------|-------------|-------------|-------------|
| <b>T</b>                           | Electrode  | °C                  | 0.3         | 3.1         | 0.4         | 0           | 1           |
| <b>pH</b>                          | Electrode  | -                   | 5.25        | 5.23        | 5.14        | 5.23        | 5.1         |
| <b>EC</b>                          | Electrode  | μS cm <sup>-1</sup> | 403         | 711         | 700         | 1064        | 160         |
| <b>Na<sup>+</sup></b>              | IC         | mg L <sup>-1</sup>  | 2.95        | 4.44        | 3.82        | 7.49        | 12.05       |
| <b>K<sup>+</sup></b>               | IC         | mg L <sup>-1</sup>  | 0.66        | <1          | 1.13        | 2.82        | 1.93        |
| <b>Ca<sup>2+</sup></b>             | IC         | mg L <sup>-1</sup>  | 72.4        | 119         | 152         | 242.0       | 375         |
| <b>Mg<sup>2+</sup></b>             | IC         | mg L <sup>-1</sup>  | 51.2        | 76.8        | 111         | 165.4       | 276         |
| <b>Al</b>                          | ICP-OES    | mg L <sup>-1</sup>  | 2.68        | 2.728       | 6.06        | 9.151       | 10.83       |
| <b>Co</b>                          | ICP-OES    | mg L <sup>-1</sup>  | 0.052       | <0.05       | 0.087       | 0.152       | 0.250       |
| <b>Cu</b>                          | ICP-OES    | mg L <sup>-1</sup>  | <0.05       | <0.5        | 0.0991      | 0.1354      | 0.16        |
| <b>Fe</b>                          | ICP-OES    | mg L <sup>-1</sup>  | <0.005      | <0.05       | <0.005      | <0.005      | <0.05       |
| <b>Mn</b>                          | ICP-OES    | mg L <sup>-1</sup>  | 0.547       | 0.268       | 1.196       | 2.02        | 3.39        |
| <b>Ni</b>                          | ICP-OES    | mg L <sup>-1</sup>  | 0.350       | 0.361       | 0.707       | 1.05        | 1.63        |
| <b>Sr</b>                          | ICP-OES    | mg L <sup>-1</sup>  | n.a.        | 0.252       | 0.287       | 0.443       | 0.69        |
| <b>Zn</b>                          | ICP-OES    | mg L <sup>-1</sup>  | 0.737       | 0.961       | 1.31        | 1.80        | 2.489       |
| <b>As</b>                          | AAS        | μg L <sup>-1</sup>  | n.a.        | <4          | <4          | <4          | <4          |
| <b>F<sup>-</sup></b>               | IC         | mg L <sup>-1</sup>  | 2.92        | 4.780       | 5.63        | 0.376       | 0.632       |
| <b>Cl<sup>-</sup></b>              | IC         | mg L <sup>-1</sup>  | 0.290       | 0.460       | 0.580       | 4.59        | 1.199       |
| <b>Br<sup>-</sup></b>              | IC         | mg L <sup>-1</sup>  | <0.016      | <0.16       | <0.16       | <0.016      | 0.021       |
| <b>NO<sub>3</sub><sup>-</sup></b>  | IC         | mg L <sup>-1</sup>  | 1.74        | 1.120       | 1.64        | 1.921       | 0.097       |
| <b>SO<sub>4</sub><sup>2-</sup></b> | IC         | mg L <sup>-1</sup>  | 415         | 654         | 777         | 1297        | 1986        |
| <b>Si</b>                          | ICP-OES    | mg L <sup>-1</sup>  | 2.26        | 5.16        | 3.76        | 4.78        | 5.71        |
| <b>TOC</b>                         | C-analyzer | mg L <sup>-1</sup>  | <1          | <0.5        | <0.5        | <0.5        | <0.5        |
| <b>TIC</b>                         | C-analyzer | mg L <sup>-1</sup>  | 0.72        | 1.13        | 2.27        | 5.00        | 5.47        |
| <b>TDS</b>                         |            | mg L <sup>-1</sup>  | 554.83      | 871.57      | 1068.66     | 1745.73     | 2682.63     |

70 1). **Table S5: Chemical analysis of streamwater samples collected between July 2021 and October 2022 at the AP1 location of the Aua Prasiira stream (Fig.**

| <b>AP1</b>                         | <b>Method</b> | <b>Unit</b>         | <b>09 Jul 2021</b> | <b>20 Aug 2021</b> | <b>06 Jul 2022</b> | <b>13 Aug 2022</b> | <b>11 Oct 2022</b> |
|------------------------------------|---------------|---------------------|--------------------|--------------------|--------------------|--------------------|--------------------|
| <b>T</b>                           | Electrode     | °C                  | 0.8                | 1.4                | 1                  | 1.9                | 1                  |
| <b>pH</b>                          | Electrode     | -                   | 4.90               | 4.90               | 5.02               | 4.9                | 4.70               |
| <b>EC</b>                          | Electrode     | µS cm <sup>-1</sup> | 1197               | 1730               | 1548               | 1734               | 2040               |
| <b>Na<sup>+</sup></b>              | IC            | mg L <sup>-1</sup>  | 8.06               | 11.3               | 8.95               | 11.47              | 14.52              |
| <b>K<sup>+</sup></b>               | IC            | mg L <sup>-1</sup>  | 1.61               | 2.07               | 2.16               | 2.03               | 1.95               |
| <b>Ca<sup>2+</sup></b>             | IC            | mg L <sup>-1</sup>  | 162                | 230                | 205                | 216.6              | 272                |
| <b>Mg<sup>2+</sup></b>             | IC            | mg L <sup>-1</sup>  | 234                | 389                | 353                | 387.7              | 493                |
| <b>Al</b>                          | ICP-OES       | mg L <sup>-1</sup>  | 15.44              | 23.447             | 26.7               | 27.50              | 28.74              |
| <b>Co</b>                          | ICP-OES       | mg L <sup>-1</sup>  | 0.280              | 0.325              | 0.396              | 0.336              | 0.433              |
| <b>Cu</b>                          | ICP-OES       | mg L <sup>-1</sup>  | <0.5               | <0.5               | 0.3190             | 0.3207             | 0.32               |
| <b>Fe</b>                          | ICP-OES       | mg L <sup>-1</sup>  | <0.05              | <0.05              | <0.005             | <0.005             | <0.05              |
| <b>Mn</b>                          | ICP-OES       | mg L <sup>-1</sup>  | 4.761              | 7.67               | 8.174              | 8.62               | 11.27              |
| <b>Ni</b>                          | ICP-OES       | mg L <sup>-1</sup>  | 1.689              | 2.520              | 2.536              | 2.78               | 3.31               |
| <b>Sr</b>                          | ICP-OES       | mg L <sup>-1</sup>  | n.a.               | 0.595              | 0.502              | 0.569              | 0.74               |
| <b>Zn</b>                          | ICP-OES       | mg L <sup>-1</sup>  | 4.214              | 5.95               | 6.96               | 7.23               | 7.812              |
| <b>As</b>                          | AAS           | µg L <sup>-1</sup>  | n.a.               | <4                 | 4.06               | <4                 | <4                 |
| <b>F<sup>-</sup></b>               | IC            | mg L <sup>-1</sup>  | 15.7               | 8.770              | 23.0               | 2.13               | 6.17               |
| <b>Cl<sup>-</sup></b>              | IC            | mg L <sup>-1</sup>  | 1.07               | 1.470              | 1.40               | 1.50               | 1.49               |
| <b>Br<sup>-</sup></b>              | IC            | mg L <sup>-1</sup>  | <0.016             | <0.16              | <0.16              | 0.021              | 0.018              |
| <b>NO<sub>3</sub><sup>-</sup></b>  | IC            | mg L <sup>-1</sup>  | 1.06               | 1.240              | 1.31               | 0.044              | 0.043              |
| <b>SO<sub>4</sub><sup>2-</sup></b> | IC            | mg L <sup>-1</sup>  | 1354               | 2318               | 2020               | 2246               | 2803               |
| <b>Si</b>                          | ICP-OES       | mg L <sup>-1</sup>  | 5.89               | 8.86               | 7.38               | 7.61               | 8.10               |
| <b>TOC</b>                         | C-analyzer    | mg L <sup>-1</sup>  | <1                 | <0.5               | <0.5               | <0.5               | <0.5               |
| <b>TIC</b>                         | C-analyzer    | mg L <sup>-1</sup>  | 1.69               | 2.76               | 1.80               | 5.40               | 3.29               |
| <b>TDS</b>                         |               | mg L <sup>-1</sup>  | 1810.24            | 3014.10            | 2674.23            | 2928.22            | 3656.77            |
